# Supplementary material for: BugMat and FindNeighbour: command line and server applications for investigating bacterial relatedness
Source: PubMed Central journal article supplement (PMC5683244; doi:10.1186/s12859-017-1907-2), 2017-11-13
Supplement: 12859_2017_1907_MOESM2_ESM.pdf [file 12859_2017_1907_MOESM2_ESM.pdf]

## Additional file 2: Environment used for FindNeighbour and Bugmat performance testing

| <b>Property</b> | <b>Result</b>                                                                                        |
|-----------------|------------------------------------------------------------------------------------------------------|
| Server          | Baremetal server running Ubuntu 16.04 LTS                                                            |
| RAM             | 128G RAM DDR3                                                                                        |
| Cpu             | 2 x Intel Xeon 2.4GHz                                                                                |
| Cores used      | 1 for server, 1 for database                                                                         |
| Database        | Postgres on localhost.                                                                               |
| Database disc   | Same as storage disc                                                                                 |
| Storage disc    | Storage of fasta and reference compressed data on 12 TB RAID5 device (4 x 4TB discs, SATA, 7200 rpm) |
